# Supplementary material
Source: publisher figshare collection journal article supplement (https://tandf.figshare.com/ndownloader/files/20040620)
Supplement: Supplementary file 1 [file 20040620]

Oxidative removal of sulfadiazine using synthetic and natural manganese dioxides

Ardie Septian, Sanghwa Oh, and Won Sik Shin*

School of Architecture, Civil, Environmental and Energy Engineering, Kyungpook National University, Daegu 41566, Korea

# *Corresponding author: Professor, Phone: +82-53-950-7584; Fax: +82-53-950-6579; E-mail: wshin@mail.knu.ac.kr

# **Supporting Information**

**Table S1. Effect of temperature on the rate constant (*k*T) of SDZ oxidation. Number in the parenthesis indicates standard deviation in 95% confidence interval.**

| pH | MnO2 | Temperature (C) |  | R2 | SSE | p-value |
| --- | --- | --- | --- | --- | --- | --- |
| 5 | Birnessite | 10 | 0.493 ( 0.014) | 0.998 | 3.800  105 | 5.000  105 |
|  |  | 20 | 0.522 ( 0.016) | 0.997 | 5.400  105 | 7.000  105 |
|  |  | 30 | 0.885 ( 0.014) | 0.999 | 4.300  105 | 1.000  105 |
|  |  | 40 | 0.938 ( 0.013) | 0.999 | 3.300  105 | 1.000  105 |
| 5 | Natural MnO2 | 10 | 0.282 ( 0.009) | 0.998 | 1.500  105 | 6.000  105 |
|  |  | 20 | 0.520 ( 0.014) | 0.998 | 4.200  105 | 5.000  105 |
|  |  | 30 | 0.550 ( 0.013) | 0.998 | 3.600  105 | 3.000  105 |
|  |  | 40 | 0.548 ( 0.009) | 0.999 | 1.600  105 | 1.000  105 |
| 8 | Birnessite | 10 | 0.334 ( 0.068) | 0.993 | 9.400  104 | 0.016 |
|  |  | 20 | 0.479 ( 0.017) | 0.996 | 6.100  105 | 1.000  104 |
|  |  | 30 | 0.861 ( 0.004) | 0.999 | 2.600  106 | 0.000 |
|  |  | 40 | 0.867 ( 0.013) | 0.999 | 3.600  105 | 1.000  105 |
| 8 | Natural MnO2 | 10 | 0.232 ( 0.041) | 0.975 | 3.400  104 | 0.011 |
|  |  | 20 | 0.532 ( 0.012) | 0.999 | 2.700  105 | 2.000  105 |
|  |  | 30 | 0.548 ( 0.006) | 0.999 | 7.900  106 | 0.000 |
|  |  | 40 | 0.530 ( 0.010) | 0.999 | 1.900  105 | 1.000  105 |

Unit: temperature = (C);  = (mmol L1 hr1). Calculated at *C*0 of MnO2 = 11.49 mmol L1 and *C*0 of SDZ = 0.4 mmol L1.

Table S2. Thermodynamic parameters of SDZ oxidation.

| pH | MnO2 | Temperature (K) | *Ea* | Δ‡*H* | Δ‡*S* | Δ‡*G* |
| --- | --- | --- | --- | --- | --- | --- |
| 5 | Birnessite | 283 | 0.005 | 1.422 | 0.004 | 2.628 |
|  |  | 293 |  | 1.472 |  | 2.721 |
|  |  | 303 |  | 1.522 |  | 2.813 |
|  |  | 313 |  | 1.572 |  | 2.906 |
| 5 | Natural | 283 | 0.004 | 1.212 | 0.003 | 2.209 |
|  | MnO2 | 293 |  | 1.255 |  | 2.287 |
|  |  | 303 |  | 1.298 |  | 2.365 |
|  |  | 313 |  | 1.341 |  | 2.443 |
| 8 | Birnessite | 283 | 0.007 | 2.007 | 0.006 | 3.799 |
|  |  | 293 |  | 2.078 |  | 3.933 |
|  |  | 303 |  | 2.149 |  | 4.068 |
|  |  | 313 |  | 2.220 |  | 4.202 |
| 8 | Natural | 283 | 0.005 | 1.477 | 0.004 | 2.740 |
|  | MnO2 | 293 |  | 1.530 |  | 2.837 |
|  |  | 303 |  | 1.582 |  | 2.933 |
|  |  | 313 |  | 1.634 |  | 3.030 |

Units: temperature = (K); Δ*H* = (kJ mol1); ΔS = (kJ K1 mol1); Δ*G* = (kJ mol1); *Ea* = (kJ mol1). R = 8.314  103 kJ mol1. Calculated at *C*0 of MnO2 = 11.49 mmol L1 and *C*0 of SDZ = 0.4 mmol L1.
